# Supplementary material for: FAM83A Promotes Lung Cancer Progression by Regulating the Wnt and Hippo Signaling Pathways and Indicates Poor Prognosis
Source: Front Oncol. 2020 Mar 5;10:180. doi: 10.3389/fonc.2020.00180 (PMC7066079; doi:10.3389/fonc.2020.00180)
Supplement: Table S1 — The correlation between FAM83A and the clinicopathological factors of lung adenocarcinomas. *P < 0.05, **P < 0.01. FAM83A, Family with sequence similarity 83, member A. [file Table_1.XLSX]

## Sheet: Sheet1
Table S1 (The correlation between FAM83A and the clinicopathological factors of lung adenocarcinomas)
		Specimen_Second_Longest_Dimension	Longest_Dimension	Shortest_Dimension	Race_Category	Site	Location	Sex	Age	T stage	N stage	M stage	TNM stage	KRAS_Mutation	EGFR_Mutation_Status	ALK_Translocation_Status
CNA_FAM83A	Pearson correlation	0.0322631	0.0606472	0.0586652	-0.000508207	0.0760367	0.140464	-0.049799	-.114*	0.0769256	0.00149795	0.0231194	0.0499178	0.196083	0.00181665	0.0217723
	P value	0.519433	0.225595	0.241152	0.991422	0.089104	0.0532379	0.258825	0.0112782	0.0808519	0.972948	0.601723	0.26143	0.129895	0.976032	0.734018
	N	401	401	401	450	501	190	516	497	516	515	512	508	61	276	246
RNA_FAM83A	Pearson correlation	0.0253727	-0.0275578	-0.0228181	0.0215391	-0.0273019	0.109469	-0.0283047	-0.069938	.176**	.195**	.090*	.231**	0.0445774	0.0525163	0.119946
	P value	0.612002	0.581692	0.648293	0.648243	0.541665	0.132714	0.520774	0.119063	5.55151e-05	8.4683e-06	0.0407107	1.32697e-07	0.728659	0.384789	0.060314
	N	402	402	402	451	502	190	517	498	517	516	513	509	63	276	246
Methylation_FAM83A	Pearson correlation	-0.0451885	0.000957117	-0.0951649	-0.00782453	-.111*	0.0100428	.102*	.106*	-.164**	-0.0261456	-0.0121236	-0.0618853	-0.176334	0.00534458	-0.0734912
	P value	0.404127	0.985909	0.0784009	0.874341	0.0191995	0.897508	0.0286301	0.0263321	0.000407573	0.576353	0.796262	0.187608	0.166837	0.931919	0.269121
	N	343	343	343	411	448	167	460	441	460	459	456	455	63	258	228
